# Supplementary material
Source: PubMed Central journal article supplement (PMC1446102)

**Figure S-1** (A) HA-Sec8 was transfected into 3T3L1 adipocytes, and cells were treated with or without insulin for 10 minutes and stained with anti-HA polyclonal antibody and anti-GM 130 monoclonal antibody (BD Biosciences Pharmingen San Diego, CA). (B) Flag-Sec8 was transfected into 3T3L1 adipocytes with or without HA-TC10 (Q<sup>67</sup>L). Cells were starved overnight and stained with anti-flag monoclonal antibody and anti-HA polyclonal antibody.

**Figure S-2** Four days after transfection with Exo70, SAP97, Sec6/8 RNAi or relevant scrambled RNAi, 3T3L1 adipocytes were harvested, treated with or without insulin for 10 minutes, and plasma membrane fractionation was performed. The expression of the insulin receptor on plasma membrane was examined by western blot.

**Figure S-3** Differentiated 3T3L1 adipocytes were transfected with Exo70, SAP97, Sec6, Sec8 RNAi or each scrambled oligo. 4days later, sells were treat with or without insulin, and lysates prepared and separated by SDSPAGE. MAPK (ERK) phosphorylation was examined by immunoblotting with anti-phosphoERK antibody.

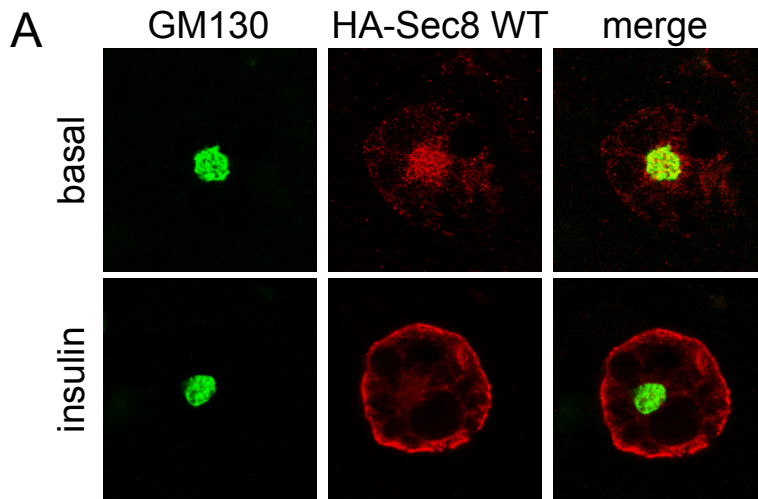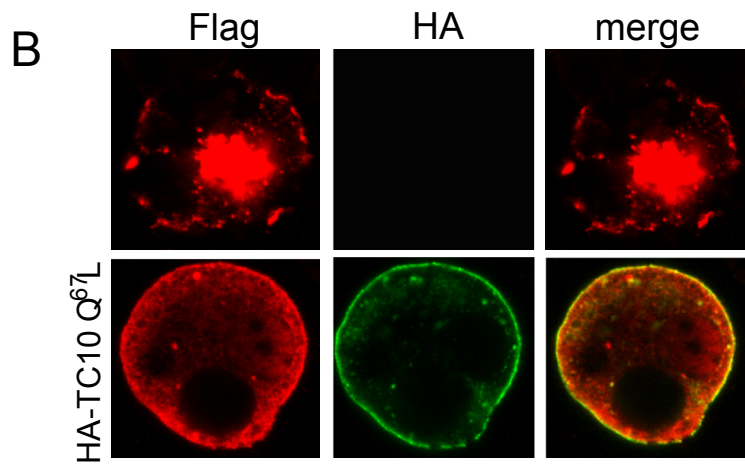

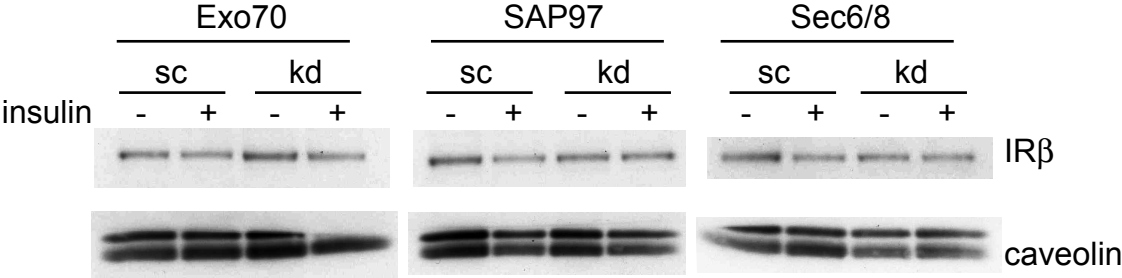

Supplemental Figure 3

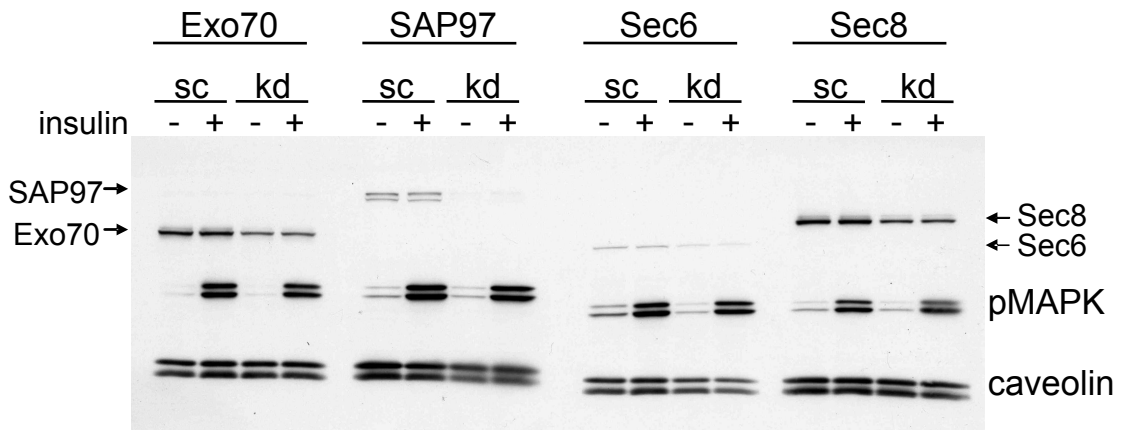

Supplement: mbc_E06-01-0030_1.pdf [file mbc_E06-01-0030_1.pdf]
